# Supplementary material
Source: PubMed Central journal article supplement (PMC8393558)

Figure S1

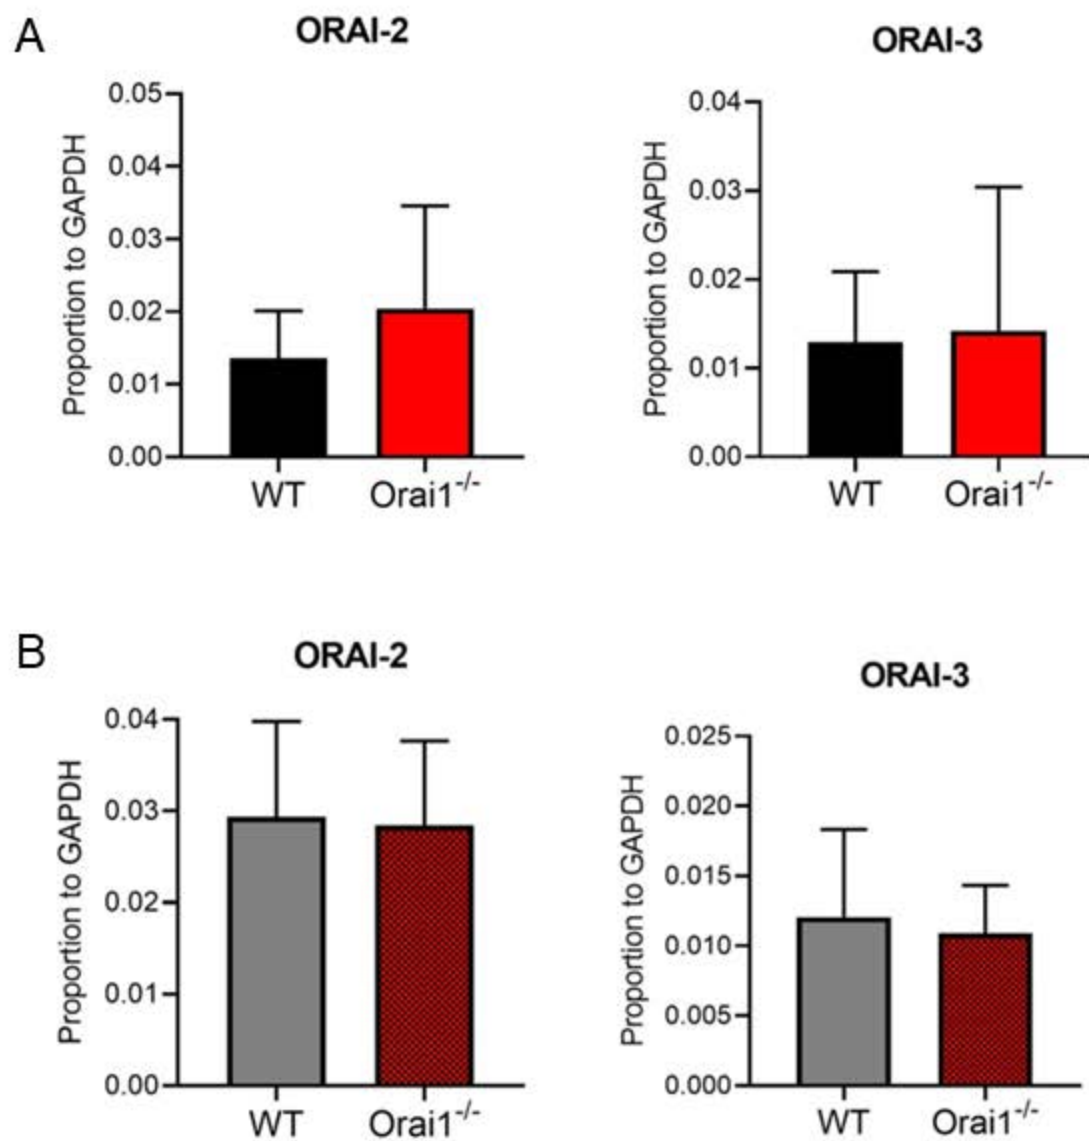

Figure S2

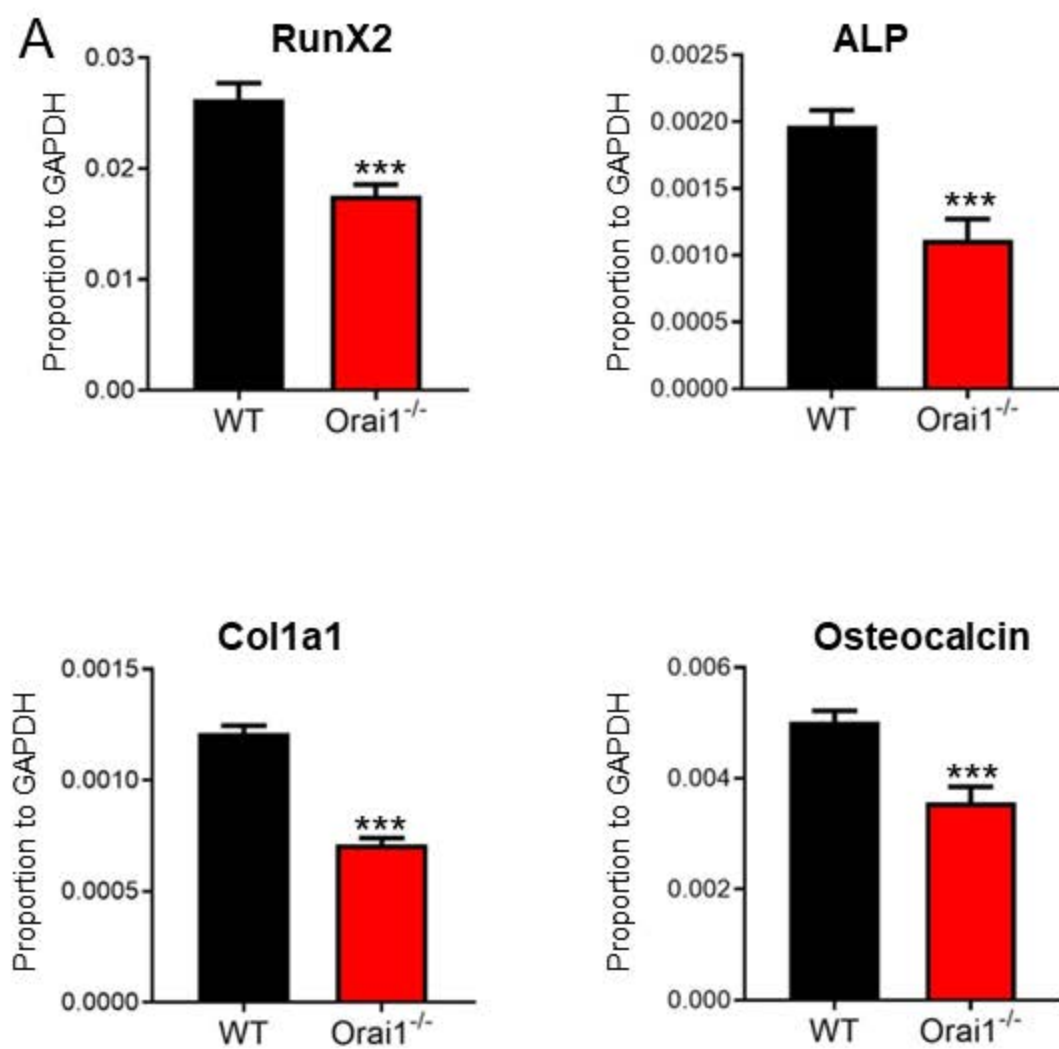

Figure S3

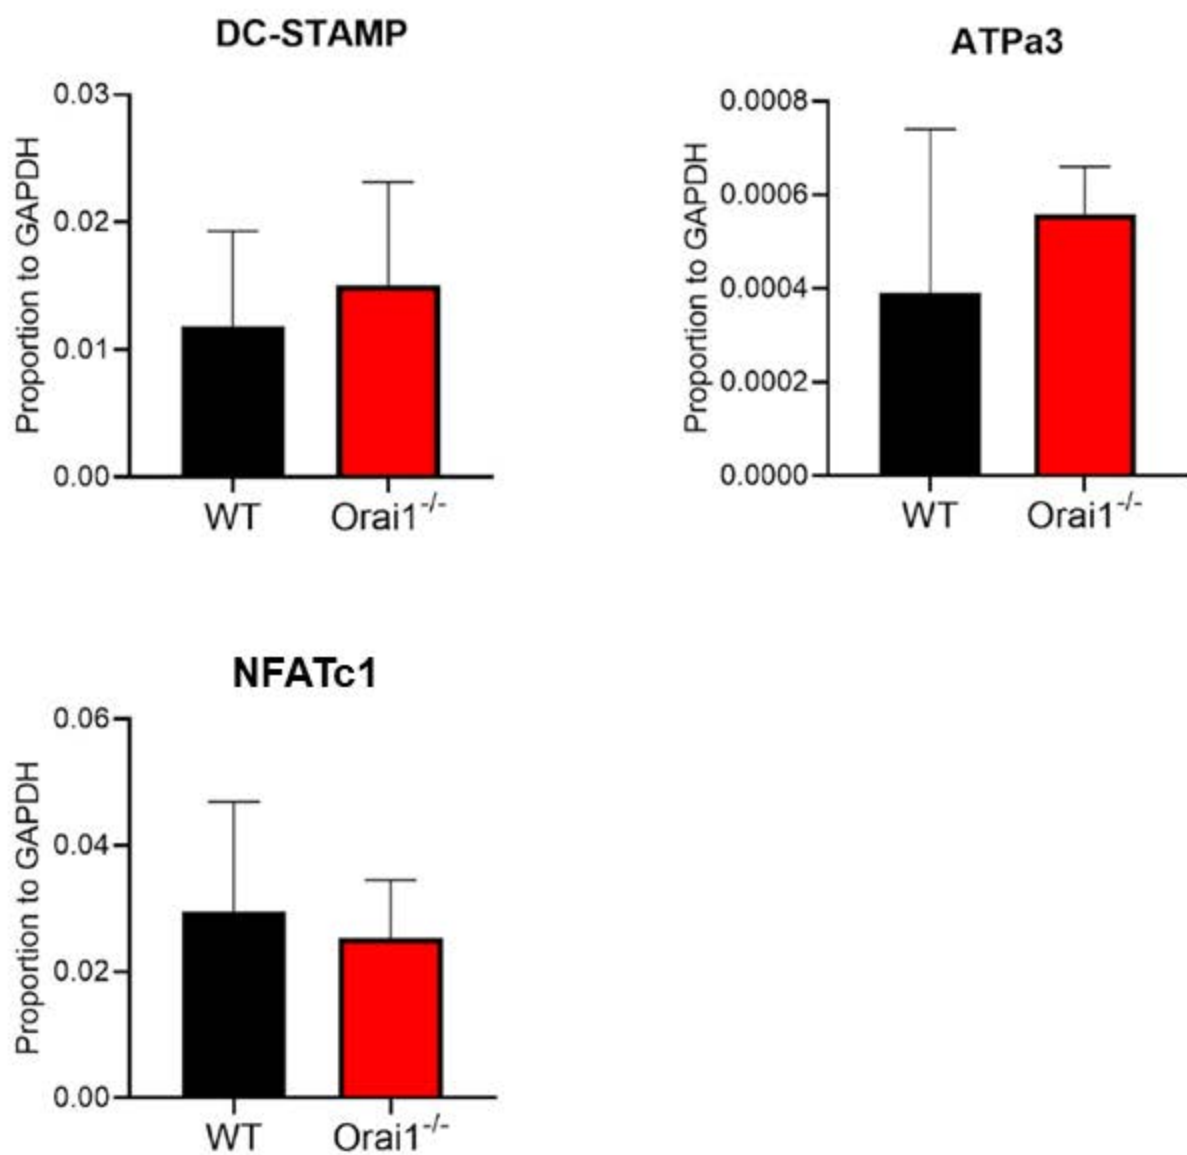

Figure S4

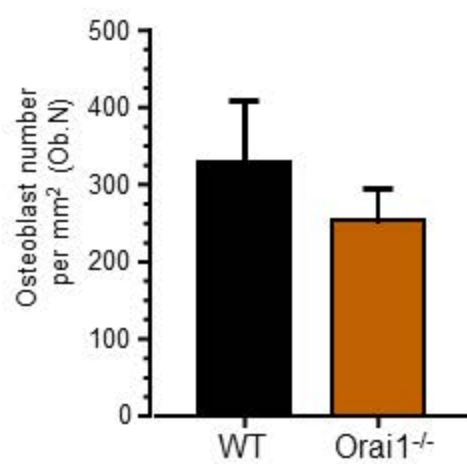

Supplement: NIHMS1730911-supplement-supp_figures.pdf [file NIHMS1730911-supplement-supp_figures.pdf]
